# Supplementary material for: Lens Thickness in Infants and Children with Cataracts
Source: PubMed Central journal article supplement — Ophthalmol Sci. 2024 Jul 26;5(1):100588. doi: 10.1016/j.xops.2024.100588 (PMC11421318; doi:10.1016/j.xops.2024.100588), 2024-07-26
Supplement: mmc1.pdf [file mmc1.pdf]

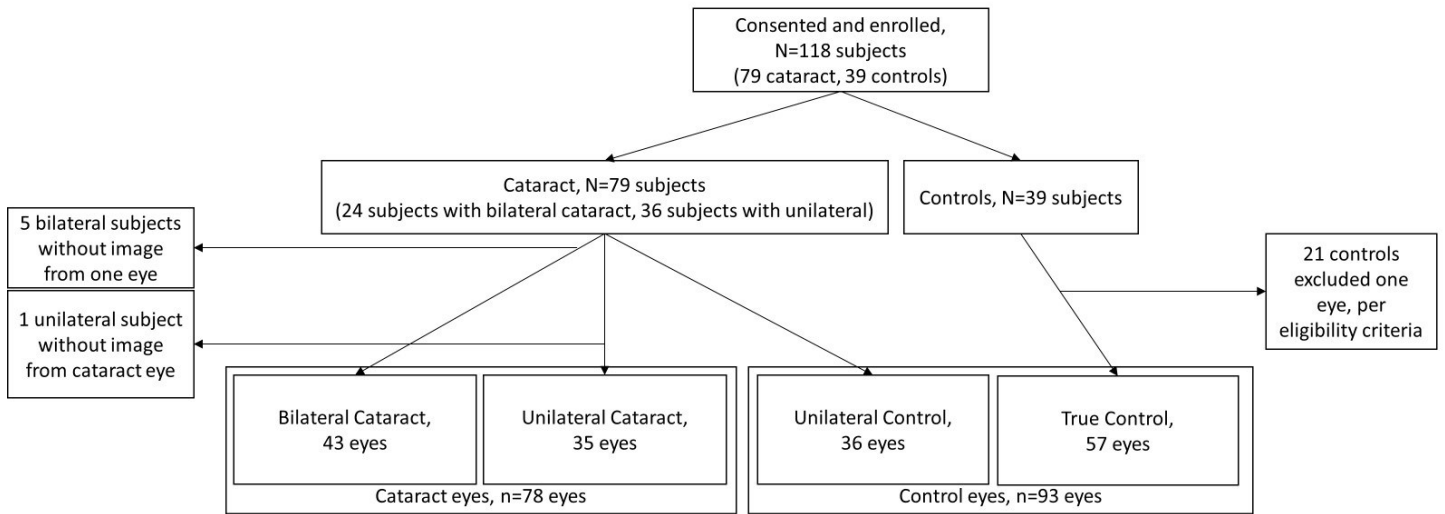

*A generalized estimating equation was used to adjust the correlation between eyes, allowing both eyes of the same subject to be included in the analysis.*

Figure S2. Study flow diagram detailing the contribution of cataract and control eyes from participants with unilateral and bilateral cataracts.
