# Supplementary material for: Lens Thickness in Infants and Children with Cataracts
Source: PubMed Central journal article supplement — Ophthalmol Sci. 2024 Jul 26;5(1):100588. doi: 10.1016/j.xops.2024.100588 (PMC11421318; doi:10.1016/j.xops.2024.100588), 2024-07-26
Supplement: mmc4.pdf [file mmc4.pdf]

Table S1. Inclusion and exclusion enrollment criteria (applied per eye)

|           | Control                                                                                                                                                                                                                                                                                                                                                                                                                                                                                                                                                            | Cataract                                                                                                                                                                                                                                                                                                                                                                                                                                                                                                                                                                                                                                                                                                                                     |
|-----------|--------------------------------------------------------------------------------------------------------------------------------------------------------------------------------------------------------------------------------------------------------------------------------------------------------------------------------------------------------------------------------------------------------------------------------------------------------------------------------------------------------------------------------------------------------------------|----------------------------------------------------------------------------------------------------------------------------------------------------------------------------------------------------------------------------------------------------------------------------------------------------------------------------------------------------------------------------------------------------------------------------------------------------------------------------------------------------------------------------------------------------------------------------------------------------------------------------------------------------------------------------------------------------------------------------------------------|
| Inclusion | <p>1) Subject age 0-5 years,<br/>                 2) Normal visual acuity for age as determined by pediatric ophthalmologist examination (central steady and maintained for subjects &lt;3 years, 20/40 or better for 3-4 years, 20/30 or better for 5 years),<br/>                 3) Age-appropriate refractive error (spherical equivalent between -2 and +4, and <math>\leq 2.5D</math> of astigmatism).</p>                                                                                                                                                   | <p>1) Subject age 0-5 years,<br/>                 2) Diagnosis of visually significant and amblyogenic lens opacity requiring cataract surgery.</p>                                                                                                                                                                                                                                                                                                                                                                                                                                                                                                                                                                                          |
| Exclusion | <p>1) Abnormal visual acuity for age including amblyopia,<br/>                 2) High refractive error (see inclusion),<br/>                 3) Past intraocular surgery,<br/>                 4) Intraocular anomaly including abnormal gonioscopy, abnormal pupil morphology, corneal opacity, corneal diameter or pachymetry &gt;2 standard deviations outside established mean value for age.<br/>                 5) History of ipsilateral trauma requiring medical evaluation. (Contralateral trauma is not grounds for exclusion of ipsilateral eye.)</p> | <p>1) Signs of glaucoma at time of enrollment, including any one of the following:<br/>                 -Elevated eye pressure (&gt;21 mmHg),<br/>                 -Corneal enlargement or clouding (&gt;2 standard deviations greater than established mean value for age for corneal diameter<sup>19</sup> or pachymetry.<sup>20</sup>)<br/>                 -Optic nerve cup to disc ratio &gt;0.6<br/>                 -Surgical procedure or medical management of intraocular pressure recommendation prior to cataract surgery.<br/>                 2) Past intraocular surgery or injury,<br/>                 3) Intraocular anomaly (either eye) in addition to cataract (i.e., Peter's anomaly, lens or iris coloboma, etc.)</p> |
