# Supplementary material for: Lens Thickness in Infants and Children with Cataracts
Source: PubMed Central journal article supplement — Ophthalmol Sci. 2024 Jul 26;5(1):100588. doi: 10.1016/j.xops.2024.100588 (PMC11421318; doi:10.1016/j.xops.2024.100588), 2024-07-26
Supplement: mmc5.pdf [file mmc5.pdf]

Table S5. Sensitivity and specificity of lens thickness as a predictor of cataract A) using lens thickness cutoffs between 3.3 and 3.9 mm; B) using lens thickness cutoffs between 3.1 and 4.0 mm.

| A)                             | Non-cataract<br>N=93            | Cataract<br>N=78                | Predictive value | Total      |
|--------------------------------|---------------------------------|---------------------------------|------------------|------------|
| Lens thickness <3.3 or >3.9 mm | 6                               | 47                              | PPV=47/53=0.887  | <b>53</b>  |
| Lens thickness 3.3-3.9 mm      | 87                              | 31                              | NPV=87/118=0.737 | <b>118</b> |
| Specificity and sensitivity    | Specificity=<br>87/93=<br>0.936 | Sensitivity=<br>47/78=<br>0.603 |                  |            |
| <b>Total</b>                   | <b>93</b>                       | <b>78</b>                       |                  |            |

| B)                            | Non-cataract<br>n=93          | Cataract<br>n=78                | Predictive value | Total      |
|-------------------------------|-------------------------------|---------------------------------|------------------|------------|
| Lens thickness <3.1 or >4.0mm | 0                             | 37                              | PPV=37/37=1.0    | <b>37</b>  |
| Lens thickness 3.1-4.0 mm     | 93                            | 41                              | NPV=93/134=0.694 | <b>134</b> |
| Specificity and sensitivity   | Specificity=<br>93/93=<br>1.0 | Sensitivity=<br>37/78=<br>0.474 |                  |            |
| <b>Total</b>                  | <b>93</b>                     | <b>78</b>                       |                  |            |
