# Supplementary material for: Lens Thickness in Infants and Children with Cataracts
Source: PubMed Central journal article supplement — Ophthalmol Sci. 2024 Jul 26;5(1):100588. doi: 10.1016/j.xops.2024.100588 (PMC11421318; doi:10.1016/j.xops.2024.100588), 2024-07-26
Supplement: mmc6.pdf [file mmc6.pdf]

Table S6. Lens thickness comparison to previous literature

| Author, Year                      | Subjects (Eyes) | Ages (months) | Device                     | Lens Thickness (mm)                                                          |                                                   | p value          | Success rate |
|-----------------------------------|-----------------|---------------|----------------------------|------------------------------------------------------------------------------|---------------------------------------------------|------------------|--------------|
|                                   |                 |               |                            | Cataract                                                                     | Control                                           |                  |              |
| Larsen, 1971 <sup>28</sup>        | (128)           | 72-84         | A scan biometry            | None                                                                         | 3.52 +/- 0.14                                     | n/a              | n/a          |
| Garner, 1990 <sup>29</sup>        | (~150)          | 72-84         | A scan biometry**          | None                                                                         | 3.71 +/- 0.22                                     | n/a              | n/a          |
| Pennie, 2001 <sup>30</sup>        | 20 (40)         | 0-12          | A scan biometry**          | None                                                                         | 3.65 +/- 0.22<br>(range 3.2 – 4.2)                | n/a              | 76% success  |
| Zadnik, 2003 <sup>31</sup>        | 2583            | 92-150        | A scan biometry            | None                                                                         | 3.46 +/- 0.18                                     | n/a              | n/a          |
| Vasavada, 2004 <sup>32</sup>      | 20 (27)         | 1.5-144       | n/a                        | 3.17 +/- 1.17<br>(range 1.71 – 4.85)                                         | None                                              | n/a              | n/a          |
| Trivedi, 2008 <sup>18</sup>       | 110 (310)       | 0-200         | Immersion A scan biometry  | 3.64 +/- 0.84<br>(range 0.61–6.35)                                           | 3.73 +/- 0.37                                     | 0.294            | 66% success  |
|                                   | (39)            | 0-6           |                            | 3.18 +/- 0.79                                                                | 3.65 +/- 0.49                                     | <b>&lt;0.001</b> |              |
| El Shakankiri, 2009 <sup>33</sup> | 21 (32)         | 1-162         | UBM and biometry           | 4.26 +/- 1.20<br>(range 2.46 - 7.26)                                         | None                                              | n/a              | 71% success  |
| Li, 2018 <sup>34</sup>            | 53 (81)         | 0-12          | Contact A scan biometry*** | PCD Cataract:<br>2.65 [2.36, 3.34]<br>Non-PCD Cataract:<br>4.51 [3.87, 5.00] | None                                              | n/a              | 82% success  |
| Wei, 2023                         | 76 (132)        | 0-60          | UBM                        | 3.29 ± 0.79<br>[3.09, 3.50]<br>(range 1.31 – 6.22)                           | 3.60 ± 0.18<br>[3.55,3.64]<br>(range 3.10 – 3.98) | <b>0.002</b>     | 100% success |

UBM=Ultrasound biomicroscopy; \*\* Allergan Zeiss Humphrey ultrasonic biometer model 820; \*\*\* Axis Nano, Quantel Medical; +Trivedi et al. includes data in the subgroup 0-6 months for comparison to this study
