# Supplementary figures and images for: Lens Thickness in Infants and Children with Cataracts
Source: PubMed Central journal article supplement — Ophthalmol Sci. 2024 Jul 26;5(1):100588. doi: 10.1016/j.xops.2024.100588 (PMC11421318; doi:10.1016/j.xops.2024.100588), 2024-07-26

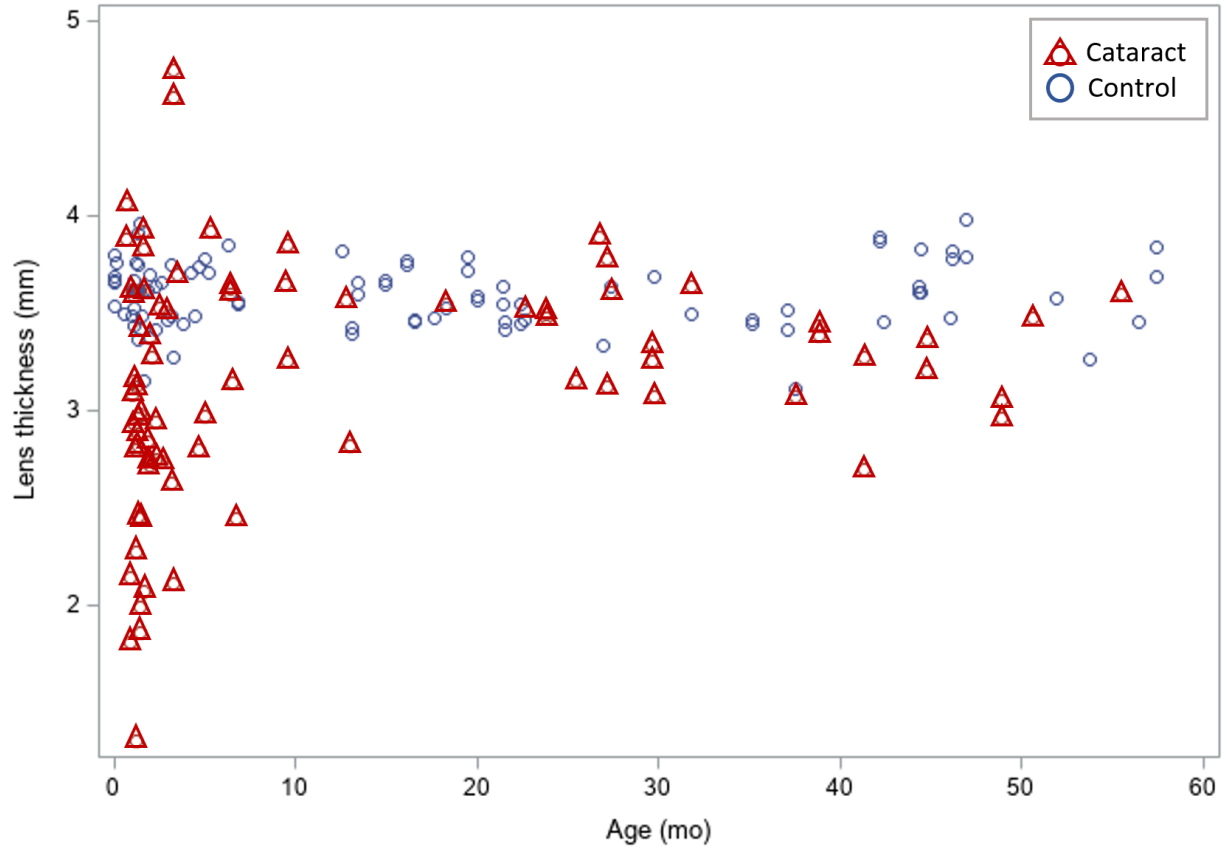

Supplement: mmc2.pdf [file mmc2.pdf]

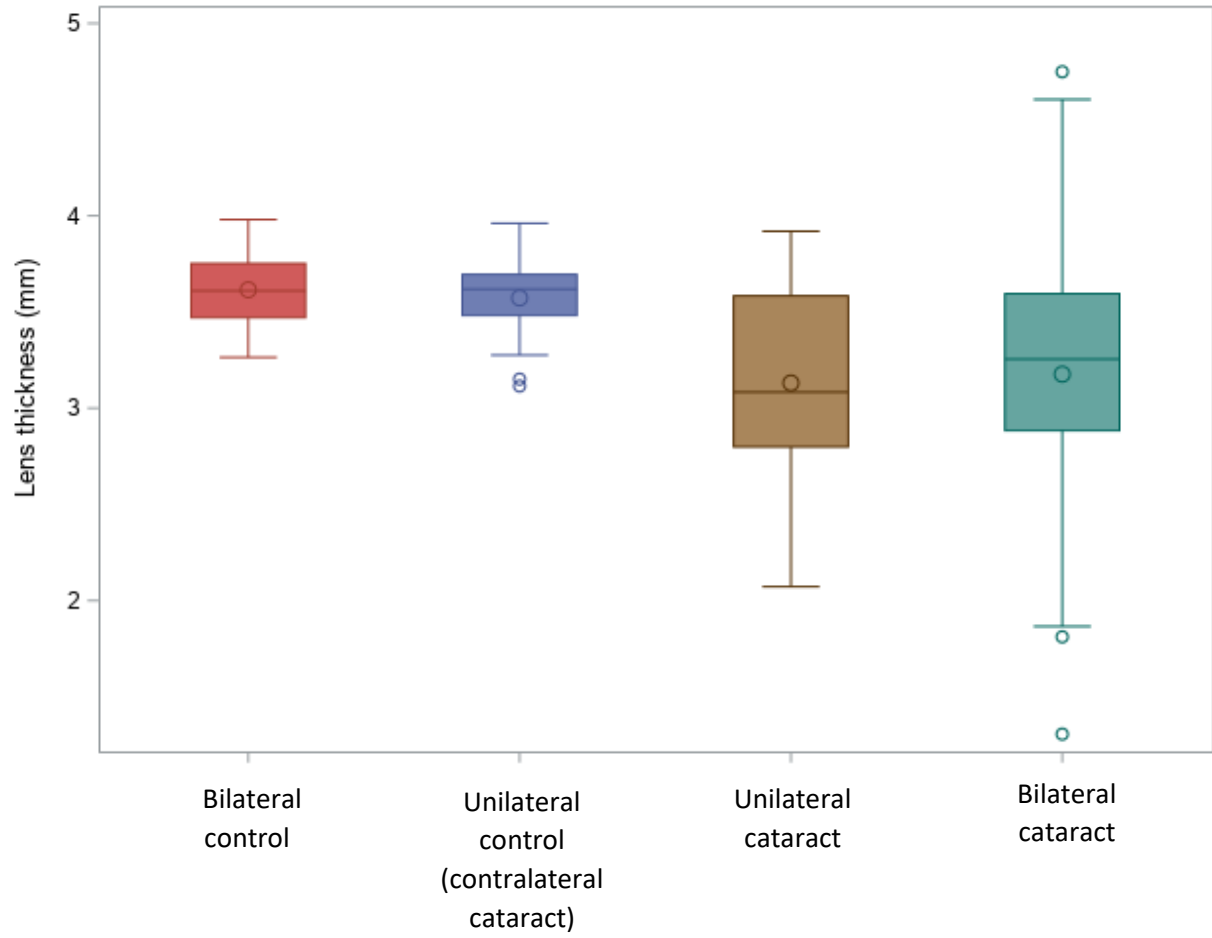

Supplement: mmc3.pdf [file mmc3.pdf]
